# Supplementary figures and images for: Flemish adolescents’ perceptions of cigarette plain packaging: a qualitative study with focus group discussions
Source: HighWire-hosted journal article supplement (doi:10.1136/bmjopen-2012-001424), 2012-01-01

Appendix 2: Picture of the tested tobacco packs

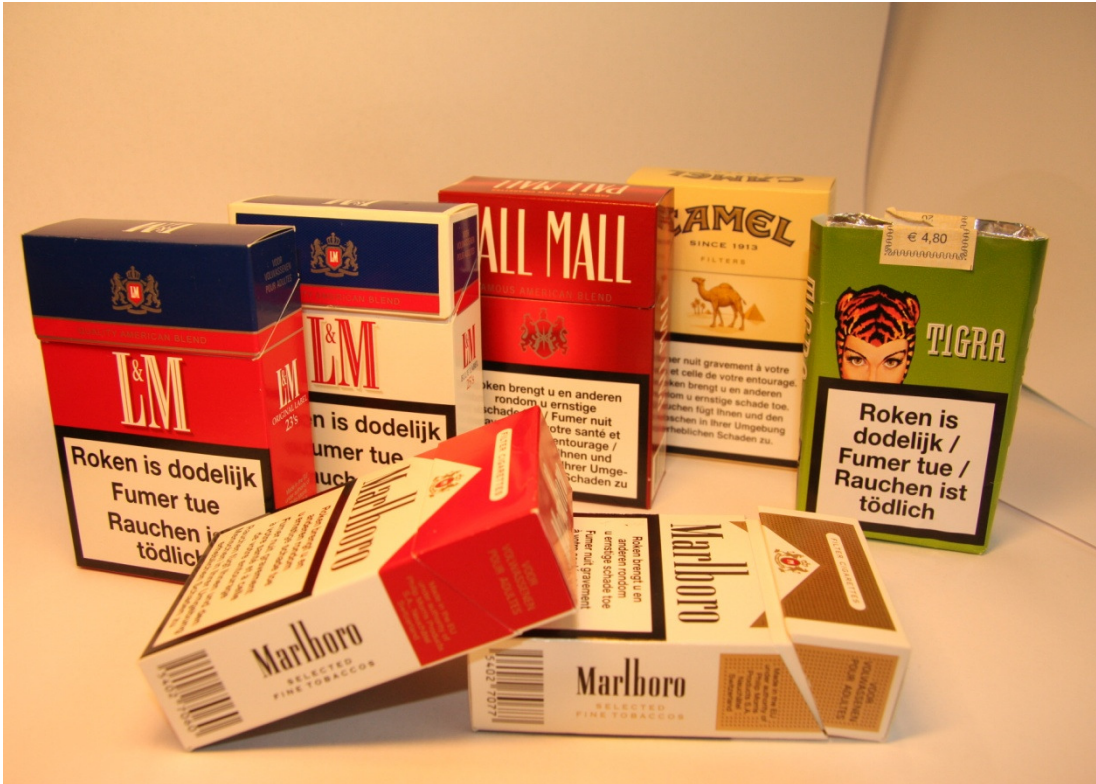

Supplement: bmjopen-2012-001424supp_figure.pdf [file bmjopen-2012-001424supp_figure.pdf]
